# Supplementary material
Source: PubMed Central journal article supplement (PMC4004588)
Supplement: NIHMS572897-supplement-01.pdf [file NIHMS572897-supplement-01.pdf]

## **ICMJE Form for Disclosure of Potential Conflicts of Interest**

---

## **ICMJE Form for Disclosure of Potential Conflicts of Interest**

---

## **ICMJE Form for Disclosure of Potential Conflicts of Interest**

---
